# Supplementary material
Source: publisher figshare collection journal article supplement (https://frontiersin.figshare.com/ndownloader/files/14788445)
Supplement: Supplementary file [file 14788445]

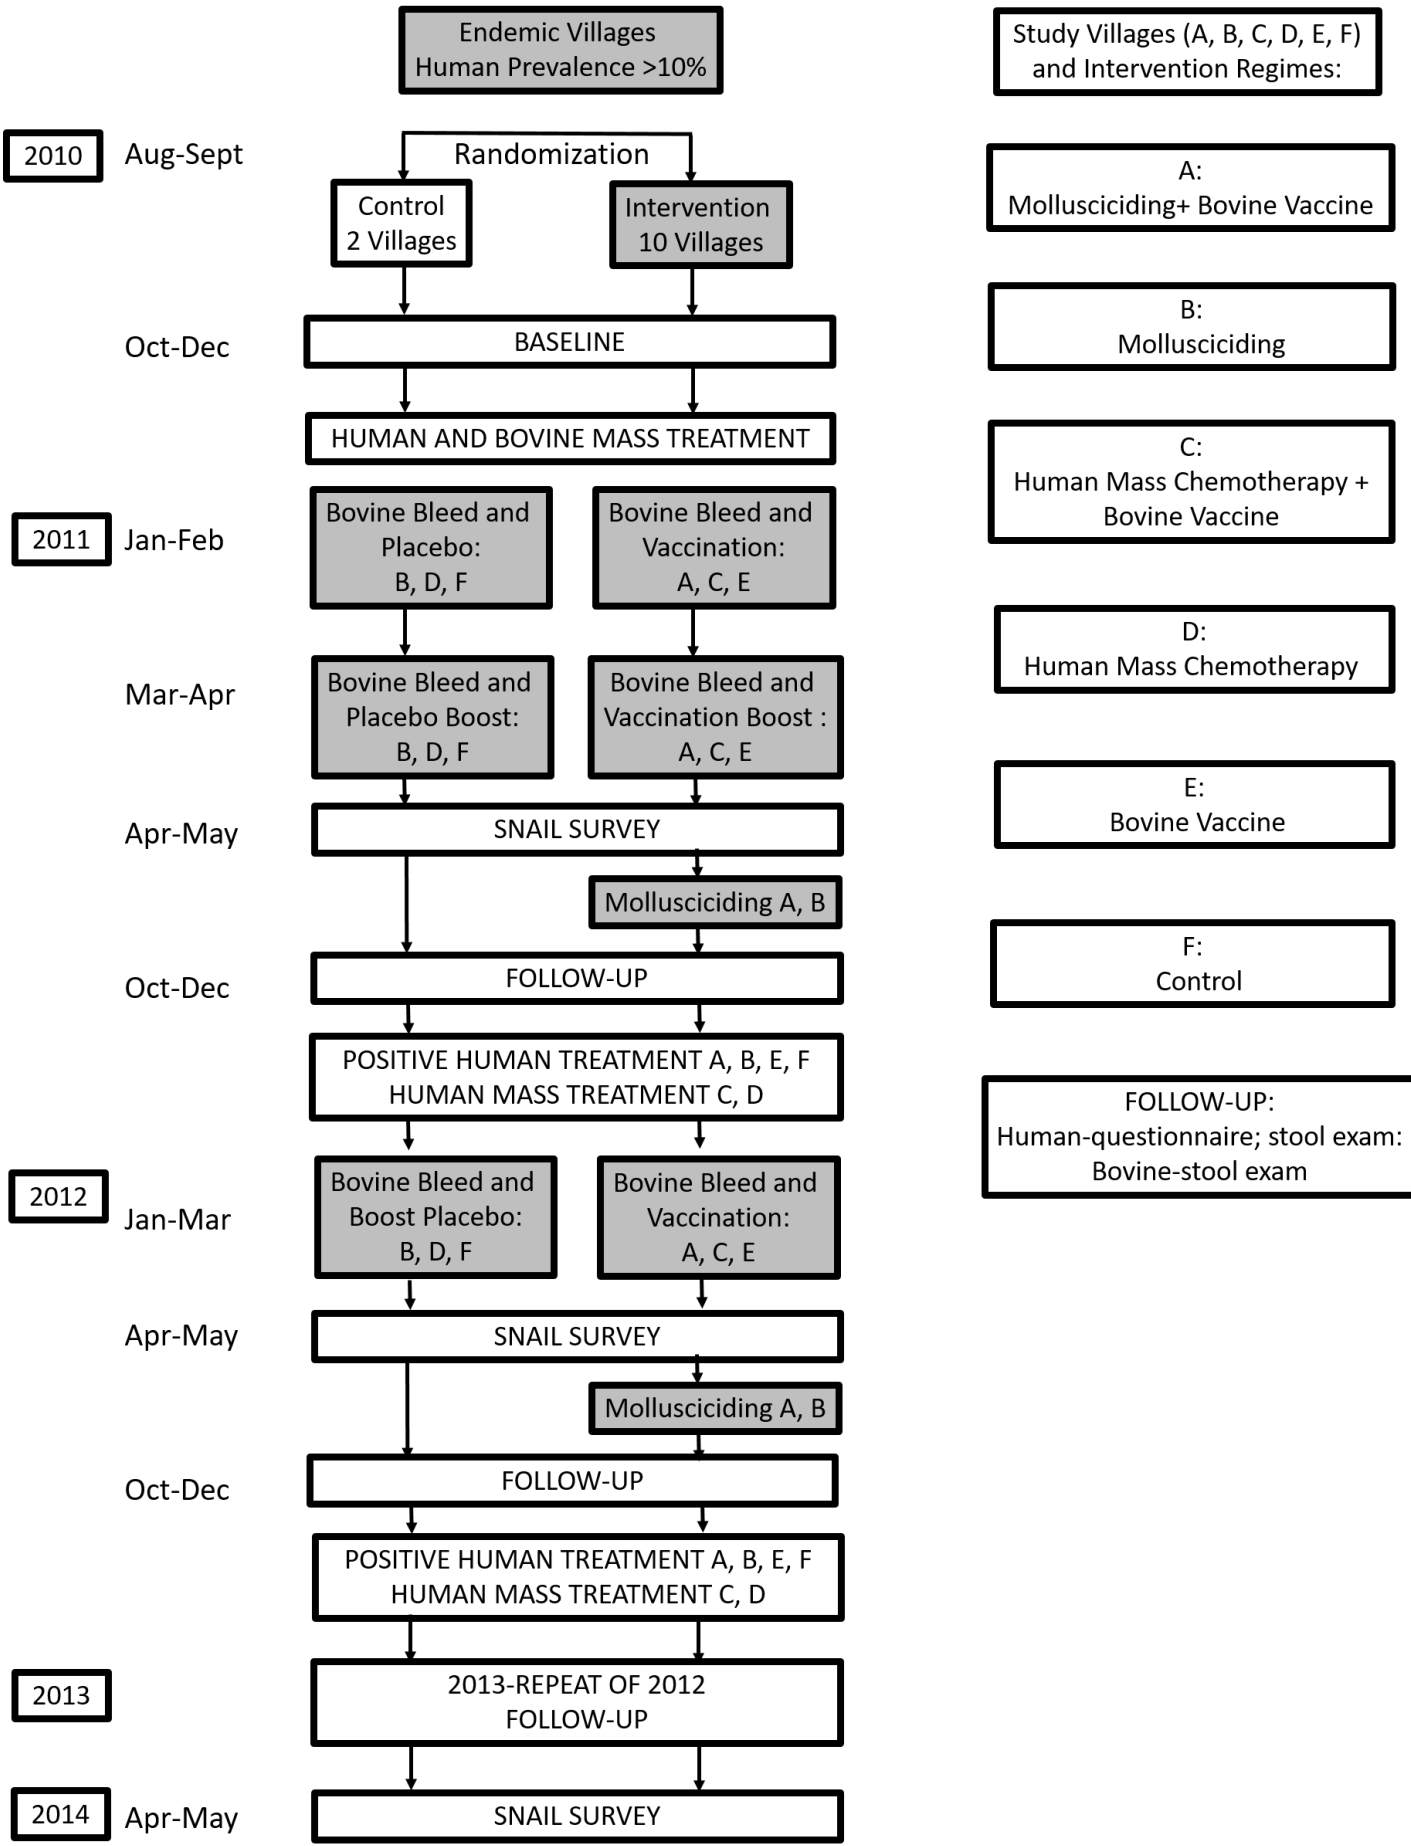

**Supplementary Figure 1.** Trial profile. Reprinted from Gray et al. (ref. 19) with permission from Elsevier.
